# Supplementary material for: Biological Properties of Vitamins of the B-Complex, Part 1: Vitamins B1, B2, B3, and B5
Source: MDPI journal article supplement (doi:10.3390/nu14030484), 2022-01-22
Supplement: s1 [file s1]

## Biological properties of vitamins of the B-complex, part 1 – vitamins B<sub>1</sub>, B<sub>2</sub>, B<sub>3</sub> and B<sub>5</sub>

Marcel Hrubša<sup>1</sup>, Tomáš Siatka<sup>2</sup>, Iveta Nejmanová<sup>3</sup>, Marie Vopršalová<sup>1</sup>, Lenka Kujovská Krčmová<sup>4,6</sup>, Kateřina Matoušová<sup>6</sup>, Lenka Javorská<sup>6</sup>, Kateřina Macáková<sup>2</sup>, Laura Mercolini<sup>7</sup>, Fernando Remião<sup>8</sup>, Marek Máťuš<sup>5\*</sup> and Přemysl Mladěnka<sup>1</sup>

# SUPPLEMENTARY DATA

**13 PAGES**

Table S1: Detailed summary of methods for determination of vitamin B<sub>1-5</sub> in human biological materials

| technique    | sensitivity nmol/L                                            | analytes                                                                                                           | matrix              | advantages                                                                                       | disadvantages                                                 | ref. | publication year |
|--------------|---------------------------------------------------------------|--------------------------------------------------------------------------------------------------------------------|---------------------|--------------------------------------------------------------------------------------------------|---------------------------------------------------------------|------|------------------|
| <b>LC-MS</b> | LOQ<br>0.15 – 8.12<br>(B <sub>1</sub> – B <sub>3</sub> -NAM)  | B <sub>1</sub> , B <sub>3</sub> -NAM,<br>B <sub>2</sub> -FAD, B <sub>2</sub> ,<br>and others                       | human milk<br>serum | * short analysis<br>time<br>* small sample<br>volume (50 µL)<br>* sensitivity                    | * SIM<br>* complicated sample<br>preparation (breast<br>milk) | [1]  | 2012             |
|              | LLOQ<br>B <sub>1</sub> -TPP 12                                | B <sub>1</sub> -TPP, and<br>others                                                                                 | whole blood         | * 250 µL sample<br>volume<br>* MRM<br>* simple sample<br>preparation<br>* short analysis<br>time | * complicated gradient<br>elution                             | [2]  | 2017             |
|              | LLOQ<br>1.54 – 15.63                                          | B <sub>1</sub> , B <sub>1</sub> -TPP,<br>B <sub>1</sub> -TMP                                                       | whole blood         | * 200 µL sample<br>volume<br>* simple sample<br>preparation<br>* MRM<br>* sensitivity            |                                                               | [3]  | 2018             |
|              | LOD<br>0.189 – 2.28<br>(B <sub>1</sub> – B <sub>5</sub> )     | B <sub>1</sub> , B <sub>2</sub> , B <sub>2</sub> -<br>FAD, B <sub>3</sub> -<br>NAM, B <sub>5</sub> , and<br>others | human milk          | * MRM<br>* short analysis<br>time<br>* sensitivity                                               | * 1 mL sample                                                 | [4]  | 2015             |
|              | LLOQ<br>21.9                                                  | B <sub>1</sub> -TPP                                                                                                | dry blood<br>(VAMS) | * MRM<br>* 2 min analysis<br>* simple extraction                                                 | * complicated gradient<br>elution                             | [5]  | 2021             |
|              | LOQ<br>1.58 – 40.94<br>(B <sub>1</sub> – B <sub>3</sub> -NAM) | B <sub>1,2,3,5</sub><br>B <sub>3</sub> -NAM, and<br>others                                                         | whole blood         | * simple extraction                                                                              | * validated only for 9<br>analytes<br>* SIM                   | [6]  | 2021             |
|              | LOD<br>0.41 – 0.91<br>(B <sub>3</sub> – B <sub>5</sub> )      | B <sub>2,3,5</sub> ,                                                                                               | plasma              | * small sample<br>volume (100 µL)                                                                | * SIM<br>* complicated sample<br>preparation                  | [7]  | 2020             |

|                                                             |                                                                    |                |                                                   |                                                         |      |      |
|-------------------------------------------------------------|--------------------------------------------------------------------|----------------|---------------------------------------------------|---------------------------------------------------------|------|------|
|                                                             |                                                                    |                | * small solvents volumes                          | * long analysis time                                    |      |      |
|                                                             |                                                                    |                | * sensitivity                                     |                                                         |      |      |
| LLOQ<br>1.33                                                | B <sub>2</sub>                                                     | plasma         | * small sample volume (100 µL)                    |                                                         | [8]  | 2019 |
|                                                             |                                                                    |                | * MRM                                             |                                                         |      |      |
|                                                             |                                                                    |                | * simple sample preparation                       |                                                         |      |      |
|                                                             |                                                                    |                | * sensitivity                                     |                                                         |      |      |
| LOQ<br>13.29                                                | B <sub>2</sub>                                                     | plasma         | * simple sample preparation                       | * long analysis time                                    | [9]  | 2020 |
|                                                             |                                                                    |                | * SIM                                             |                                                         |      |      |
| LLOQ<br>1 – 60<br>(B <sub>1</sub> – B <sub>5</sub> )        | B <sub>1,2,3,5</sub> and its vitamers (21 analytes)                | plasma         | * simple sample preparation                       |                                                         | [10] | 2015 |
|                                                             |                                                                    |                | * MRM                                             |                                                         |      |      |
|                                                             |                                                                    |                | * sensitivity                                     |                                                         |      |      |
| LOQ<br>26.57 – 246.32<br>(B <sub>3</sub> – B <sub>5</sub> ) | fat + water soluble vitamins (12 analytes)<br>B <sub>1,2,3,5</sub> | serum<br>tears | * one extraction for both groups of vitamins      | * not sufficient validation parameters for all analytes | [11] | 2018 |
|                                                             |                                                                    |                | * simple sample preparation                       |                                                         |      |      |
|                                                             |                                                                    |                | * MRM                                             |                                                         |      |      |
|                                                             |                                                                    |                | * small sample volume (200 µL serum, 70 µL tears) |                                                         |      |      |
| LOD<br>29.23                                                | B <sub>2</sub>                                                     | urine          | * small sample volume (50 µL)                     |                                                         | [12] | 2011 |
|                                                             |                                                                    |                | * MRM                                             |                                                         |      |      |
| LLOQ<br>45.61                                               | B <sub>5</sub> ,<br>7 analytes                                     | plasma         | * simple sample preparation in 96well plate       | * SIM                                                   | [13] | 2016 |
|                                                             |                                                                    |                | * small sample volume (50 µL)                     |                                                         |      |      |
|                                                             |                                                                    |                | * short analysis time                             |                                                         |      |      |

|                                                    |                                                                                                                         |                                                              |                           |                                                                              |                                                                                            |      |      |
|----------------------------------------------------|-------------------------------------------------------------------------------------------------------------------------|--------------------------------------------------------------|---------------------------|------------------------------------------------------------------------------|--------------------------------------------------------------------------------------------|------|------|
| <b>HPLC-FLD</b>                                    | LOQ<br>4.27 – 5.17<br>(B <sub>1</sub> – B <sub>1</sub> -TMP)                                                            | B <sub>1</sub> , B <sub>1</sub> -TPP,<br>B <sub>1</sub> -TMP | whole blood               | * 250 µL sample<br>volume                                                    | * no IS<br>* complicated sample<br>preparation<br>* derivatization<br>* long analysis time | [14] | 2020 |
|                                                    | LLOQ<br>23.51                                                                                                           | B <sub>1</sub> -TPP                                          | dry blood spot            |                                                                              | * complicated sample<br>preparation<br>* derivatization<br>* long analysis time            | [15] | 2019 |
|                                                    | LOQ<br>1.5 – 3                                                                                                          | B <sub>1</sub> , B <sub>1</sub> -TMP,<br>B <sub>1</sub> -TPP | dry blood spot            | * microplates used<br>in sample<br>preparation<br>* sensitivity              | * complicated sample<br>preparation<br>* toxic solvents usage                              | [16] | 2020 |
|                                                    | LLOQ<br>20                                                                                                              | B <sub>1</sub> -TPP                                          | whole blood               | * small sample<br>volume (100 µL)<br>* simple<br>derivatization<br>procedure | * no IS                                                                                    | [17] | 2020 |
|                                                    | LLOQ<br>1                                                                                                               | B <sub>2</sub> , B <sub>2</sub> -FAD,<br>B <sub>2</sub> -FMN | plasma                    | * simple sample<br>preparation<br>* microplates usage<br>* sensitivity       |                                                                                            | [18] | 2011 |
|                                                    | LOQ<br>0.5                                                                                                              | B <sub>1</sub> , B <sub>1</sub> -TMP,<br>B <sub>1</sub> -TPP | whole blood<br>human milk | * sensitivity                                                                | * derivatization<br>* no IS                                                                | [19] | 2012 |
| <b>HPLC-PDA</b>                                    | LOD<br>B <sub>2</sub> 212.56                                                                                            | B <sub>2</sub>                                               | urine                     | * simple sample<br>preparation                                               | * long analysis time                                                                       | [20] | 2009 |
|                                                    | LOD<br>B <sub>1</sub> $1.48 \times 10^3$<br>B <sub>3</sub> -NAM $4.09 \times 10^3$<br>B <sub>2</sub> $0.53 \times 10^3$ | B <sub>1</sub> , B <sub>3</sub> -NAM,<br>B <sub>2</sub>      | urine<br>plasma           |                                                                              | * no optimal recovery<br>* long analysis time<br>* poor sensitivity                        | [21] | 2014 |
|                                                    | LOD<br>1                                                                                                                | B <sub>1</sub>                                               | urine                     | * simple<br>* cheap<br>* small sample<br>(100 µL) and<br>solvents volumes    | * research only - not<br>commercially<br>available<br>* indirect detection                 | [22] | 2002 |
| <b>Sensors /<br/>nanodots /<br/>CL / FLD / ECD</b> |                                                                                                                         |                                                              |                           |                                                                              |                                                                                            |      |      |

|                                  |                             |                                    |                        |                                                      |                                                                                                                  |         |      |
|----------------------------------|-----------------------------|------------------------------------|------------------------|------------------------------------------------------|------------------------------------------------------------------------------------------------------------------|---------|------|
|                                  |                             |                                    |                        | * no sample preparation                              |                                                                                                                  |         |      |
|                                  |                             |                                    |                        | * short analysis                                     |                                                                                                                  |         |      |
|                                  |                             |                                    |                        | * sensitivity                                        |                                                                                                                  |         |      |
|                                  | LOD<br>$6.8 \times 10^{-6}$ | B <sub>1</sub>                     | serum                  | * selectivity<br>* simple sample preparation         | * preparation of functionalized gold nanoparticles                                                               | [23]    | 2015 |
|                                  | LOD<br>0.717                | B <sub>1</sub>                     | serum<br>urine         | * sensitivity                                        | * indirect detection                                                                                             | [24]    | 2017 |
|                                  | LOD<br>$0.25 \times 10^3$   | B <sub>1</sub>                     | serum<br>urine         |                                                      | * indirect determination<br>* not sensitive for biological material<br>* poor sensitivity                        | [25]    | 2018 |
|                                  | LOD<br>0.86                 | B <sub>2</sub>                     | plasma                 | * sensitivity                                        | * not available in the market<br>* research only<br>* standard addition method not suitable in clinical analysis | [26]    | 2020 |
| <b>SFC-MS</b>                    | not specified               | B <sub>3</sub> and its metabolites | urine<br>rabbit plasma | * short analysis time<br>* simple sample preparation | * no data using human biofluids available                                                                        | [27,28] |      |
|                                  | LLOQ<br>83.93               | B <sub>5</sub>                     | serum                  | * small sample volume (50 µL)                        | * high price (working in duplicate recommended)<br>* long analysis time (24 h)                                   | [29]    |      |
| <b>Microbiological test kits</b> | LLOQ<br>64.98               | B <sub>3</sub>                     | serum                  | * small sample volume (100 µL)                       | * high price (working in duplicate recommended)<br>* long analysis time (24 h)                                   | [30]    |      |

|                            |                                                                                    |                                                              |                       |                                                                                                                                   |                                                                                                                                                                                                    |      |      |
|----------------------------|------------------------------------------------------------------------------------|--------------------------------------------------------------|-----------------------|-----------------------------------------------------------------------------------------------------------------------------------|----------------------------------------------------------------------------------------------------------------------------------------------------------------------------------------------------|------|------|
| <b>HPLC-FLD<br/>(kits)</b> | LOD<br>B <sub>1</sub> -TPP 1.18<br>B <sub>2</sub> -FAD 12.71                       | B <sub>1</sub> -TPP, B <sub>2</sub> -<br>FAD and<br>others   | plasma<br>whole blood | * small sample<br>volume (100 –<br>300 µL)<br>* sensitivity                                                                       | * no IS<br>* long analysis time<br>* different extraction<br>procedures for each<br>vitamin<br>* different analysis<br>conditions<br>(temperature etc.)<br>* high price for small<br>sample series | [31] | 2021 |
|                            | LOD<br>1.18                                                                        | B <sub>1</sub> -TPP                                          | whole blood           | * small sample<br>volume (50 µL)<br>* sensitivity                                                                                 | * long analysis time<br>* high price for small<br>sample series                                                                                                                                    | [32] | 2021 |
|                            | LOD<br>B <sub>1</sub> 1.89<br>B <sub>1</sub> -TPP 1.18<br>B <sub>1</sub> -TMP 1.45 | B <sub>1</sub> , B <sub>1</sub> -TPP,<br>B <sub>1</sub> -TMP | whole blood           | * short analysis<br>time<br>* possible to use for<br>B <sub>2</sub> and B <sub>6</sub> vitamins<br>determination<br>* sensitivity | * high price for small<br>sample series                                                                                                                                                            | [33] | 2021 |
|                            | LOD only for B <sub>2</sub> -FAD<br>12.7                                           | B <sub>2</sub> , B <sub>2</sub> -FAD,<br>B <sub>2</sub> -FMN | whole blood           | * small sample<br>volume (200 µL)<br>* possible to use for<br>B <sub>1</sub> and B <sub>6</sub> vitamins<br>determination         | * high price for small<br>sample series                                                                                                                                                            | [34] | 2021 |
| <b>LC-MS/MS<br/>(kits)</b> | LOD<br>B <sub>1</sub> -TPP 4.4<br>B <sub>2</sub> -FAD 3.41                         | B <sub>1</sub> -TPP, B <sub>2</sub> -<br>FAD and<br>others   | whole blood           | * IS<br>* MRM<br>* short analysis<br>time<br>* small sample<br>volume (50 µL)<br>* simple sample<br>preparation<br>* sensitivity  | * high price for small<br>sample series                                                                                                                                                            | [35] | 2021 |
| <b>ELISA kits</b>          | LOD<br>6.93                                                                        | B <sub>2</sub>                                               | serum<br>plasma       | * small sample<br>volume (250 µL)                                                                                                 | * for research only<br>* cross reactivity with<br>analogues                                                                                                                                        | [36] | 2021 |

|                                |                |                                                                      |                                                                                        |                                                                                 |      |      |
|--------------------------------|----------------|----------------------------------------------------------------------|----------------------------------------------------------------------------------------|---------------------------------------------------------------------------------|------|------|
|                                |                | cell culture<br>supernatant<br>tissue<br>breast milk<br>sperm<br>... | * one kit for various<br>matrices                                                      | * time and money<br>consuming for small<br>sample series                        |      |      |
| LOD<br>6.78                    | B <sub>2</sub> | serum<br>plasma                                                      | * small sample<br>volume (50 µL)<br>* one kit for various<br>matrices                  | * for research only<br>* time and money<br>consuming for small<br>sample series | [37] | 2021 |
| LOD<br>0.93 × 10 <sup>-3</sup> | B <sub>1</sub> | serum<br>plasma<br>urine<br>cell culture<br>supernatant<br>tissue    | * small sample<br>volume (40 µL)<br>* one kit for various<br>matrices<br>* sensitivity | * for research only<br>* time and money<br>consuming for small<br>sample series | [38] | 2021 |

<sup>1</sup> LOD Limit of Detection, <sup>2</sup> LOQ Limit of Quantitation, <sup>3</sup> LLOQ Lower Limit of Quantitation

B<sub>1</sub>, thiamine; B<sub>1</sub>-TPP, thiamine pyrophosphate/diphosphate; B<sub>1</sub>-TMP, thiamine monophosphate; B<sub>2</sub>, riboflavin; B<sub>2</sub>-FAD, flavin adenine dinucleotide; B<sub>2</sub>-FMN, flavin adenine mononucleotide; B<sub>3</sub>, niacin; B<sub>3</sub>-NAM, nicotinamide; B<sub>5</sub>, pantothenic acid; CL, Chemiluminescence; ECD, Electrochemical Detection; ELISA, Enzyme-Linked ImmunoSorbent Assay; FLD, Fluorescence Detection; HPLC, High Performance Liquid Chromatography; IS, Internal Standard; LC-MS, Coupling of Liquid Chromatography and Mass Spectrometry; MRM, Multiple Reaction Monitoring; MS, Mass Spectrometry; MS/MS, Tandem Mass Spectrometry; PDA, Photodiode-Array Detection; SFC-MS, Coupling of Supercritical Fluid Chromatography and Mass Spectrometry; SIM, Selected Ion Monitoring; VAMS, Volumetric Absorptive Microsampling.

**Table S2:** Brief overview of human flavoproteins

| Enzyme                                                                           | Cofactor |
|----------------------------------------------------------------------------------|----------|
| D-lactate dehydrogenase                                                          | FAD      |
| Xanthine dehydrogenase                                                           | FAD      |
| (S)-2-hydroxy-acid oxidase                                                       | FMN      |
| Glycerol 3-phosphate dehydrogenase                                               | FAD      |
| Choline dehydrogenase                                                            | FAD      |
| L-2-Hydroxyglutarate dehydrogenase                                               | FAD      |
| D-2-Hydroxyglutarate dehydrogenase                                               | FAD      |
| Aldehyde oxidase                                                                 | FAD      |
| Dihydropyrimidine dehydrogenase                                                  | FMN      |
| 3 $\beta$ -Hydroxysterol $\delta^{24}$ -reductase                                | FAD      |
| Dihydroorotate dehydrogenase                                                     | FMN      |
| Protoporphyrinogen IX oxidase                                                    | FAD      |
| Acyl-CoA oxidase                                                                 | FAD      |
| Glutaryl-CoA oxidase                                                             | FAD      |
| Succinate dehydrogenase                                                          | FAD      |
| Short-chain-(butyryl-) acyl CoA dehydrogenase                                    | FAD      |
| Medium-chain acyl-CoA dehydrogenase                                              | FAD      |
| Glutaryl-CoA dehydrogenase                                                       | FAD      |
| Isovaleryl-CoA dehydrogenase                                                     | FAD      |
| 2-Methylbutyryl-CoA dehydrogenase                                                | FAD      |
| Long-chain-acyl-CoA dehydrogenase                                                | FAD      |
| Very long-chain acyl-CoA dehydrogenase                                           | FAD      |
| Isobutyryl-CoA dehydrogenase                                                     | FAD      |
| Long-chain-unsaturated-acyl-CoA dehydrogenase (molecular chaperone of complex I) | FAD      |
| Long-and branched-chain-acyl-CoA dehydrogenase                                   | FAD      |
| C22-long-chain-acyl-CoA dehydrogenase                                            | FAD      |
| D-aspartate oxidase                                                              | FAD      |
| L-amino acid oxidase                                                             | FAD      |
| D-amino acid oxidase                                                             | FAD      |
| Monoamine oxidase                                                                | FAD      |
| Pyridoxal 5'-phosphate oxidase (Pyridoxine 5'-phosphate oxidase)                 | FMN      |
| Catecholamine oxidase (renalase)                                                 | FAD      |
| Methylenetetrahydrofolate reductase                                              | FAD      |
| L-pipecolate oxidase                                                             | FAD      |
| Spermine oxidase                                                                 | FAD      |
| Electron-transferring flavoprotein-ubiquinone oxidoreductase                     | FAD      |
| Electron transferring flavoprotein                                               | FAD      |
| Sarcosine dehydrogenase                                                          | FAD      |
| Dimethylglycine dehydrogenase                                                    | FAD      |
| Lysine-specific histone demethylase                                              | FAD      |
| Proline dehydrogenase                                                            | FAD      |
| Cytochrome-b5 reductase                                                          | FAD      |
| NADPH-hemoprotein reductase (cytochrome P450 reductase)                          | FMN, FAD |
| NAD(P)H dehydrogenase (quinone)                                                  | FAD      |
| NADH-ubiquinone oxidoreductase of complex I, subunit UQOR1                       | FMN      |
| NADPH-dependent diflavin oxidoreductase 1                                        | FMN, FAD |
| tRNA dihydrouridine synthase                                                     | FMN      |
| Dihydrolipoyl dehydrogenase                                                      | FAD      |
| Glutathione-disulfide reductase                                                  | FAD      |
| Thioredoxin-disulfide reductase                                                  | FAD      |
| ER flavoprotein associated with degr.                                            | FAD      |
| Sulfhydryl oxidase                                                               | FAD      |
| Prenylcysteine oxidase                                                           | FAD      |
| Ribosyldihydronicotinamide dehydrogenase                                         | FAD      |
| Flavin-containing monooxygenases                                                 | FAD      |
| Kynurenine 3-monooxygenase                                                       | FAD      |
| Nitric-oxide synthase                                                            | FMN, FAD |
| Squalene monooxygenase                                                           | FAD      |
| Monooxygenase in coenzyme Q biosynthesis                                         | FAD      |
| Ferrioreductase (biliverdin IX beta reductase)                                   | FMN      |
| Methionine synthase reductase                                                    | FMN      |
| Ferredoxin-NADP+ reductase                                                       | FAD      |
| NAD(P)H oxidase cytochrome b(558), beta subunit                                  | FAD      |
| Thyroid oxidase / dual oxidase                                                   | FAD      |
| Acetolactate synthase-like protein                                               | FAD      |
| Alkyldihydroxyacetone phosphate synthase                                         | FAD      |
| 4'-Phosphopantothenoylecysteine decarboxylase                                    | FMN      |
| Cryptochrome                                                                     | FAD      |
| Apoptosis inducing protein                                                       | FAD      |
| Apoptosis inducing protein                                                       | 6-OH-FAD |
| Iodotyrosine deiodinase                                                          | FMN      |
| Axon guidance protein Interacting with CasL                                      | FAD      |
| FAD-dependent oxidoreductase (molecular chaperone of complex 1)                  | FAD      |

Data for this table are from [39].



**Table S3. Average recommended intake of pantothenic acid for different age groups**

|                         |            |
|-------------------------|------------|
| Birth to 6 months       | 1.7 mg/day |
| Infants 7-12 months     | 1.8 mg/day |
| Children 1-3 years      | 2 mg/day   |
| Children 4-8 years      | 3 mg/day   |
| Children 8-13 years     | 4 mg/day   |
| Adolescent 14- 18 years | 5 mg/day   |
| Adult 19- 50 years      | 5 mg/day   |
| 51 years and older      | 5 mg/day   |
| Pregnancy               | 6 mg/day   |
| Lactation               | 7 mg/day   |

Data are from [40]

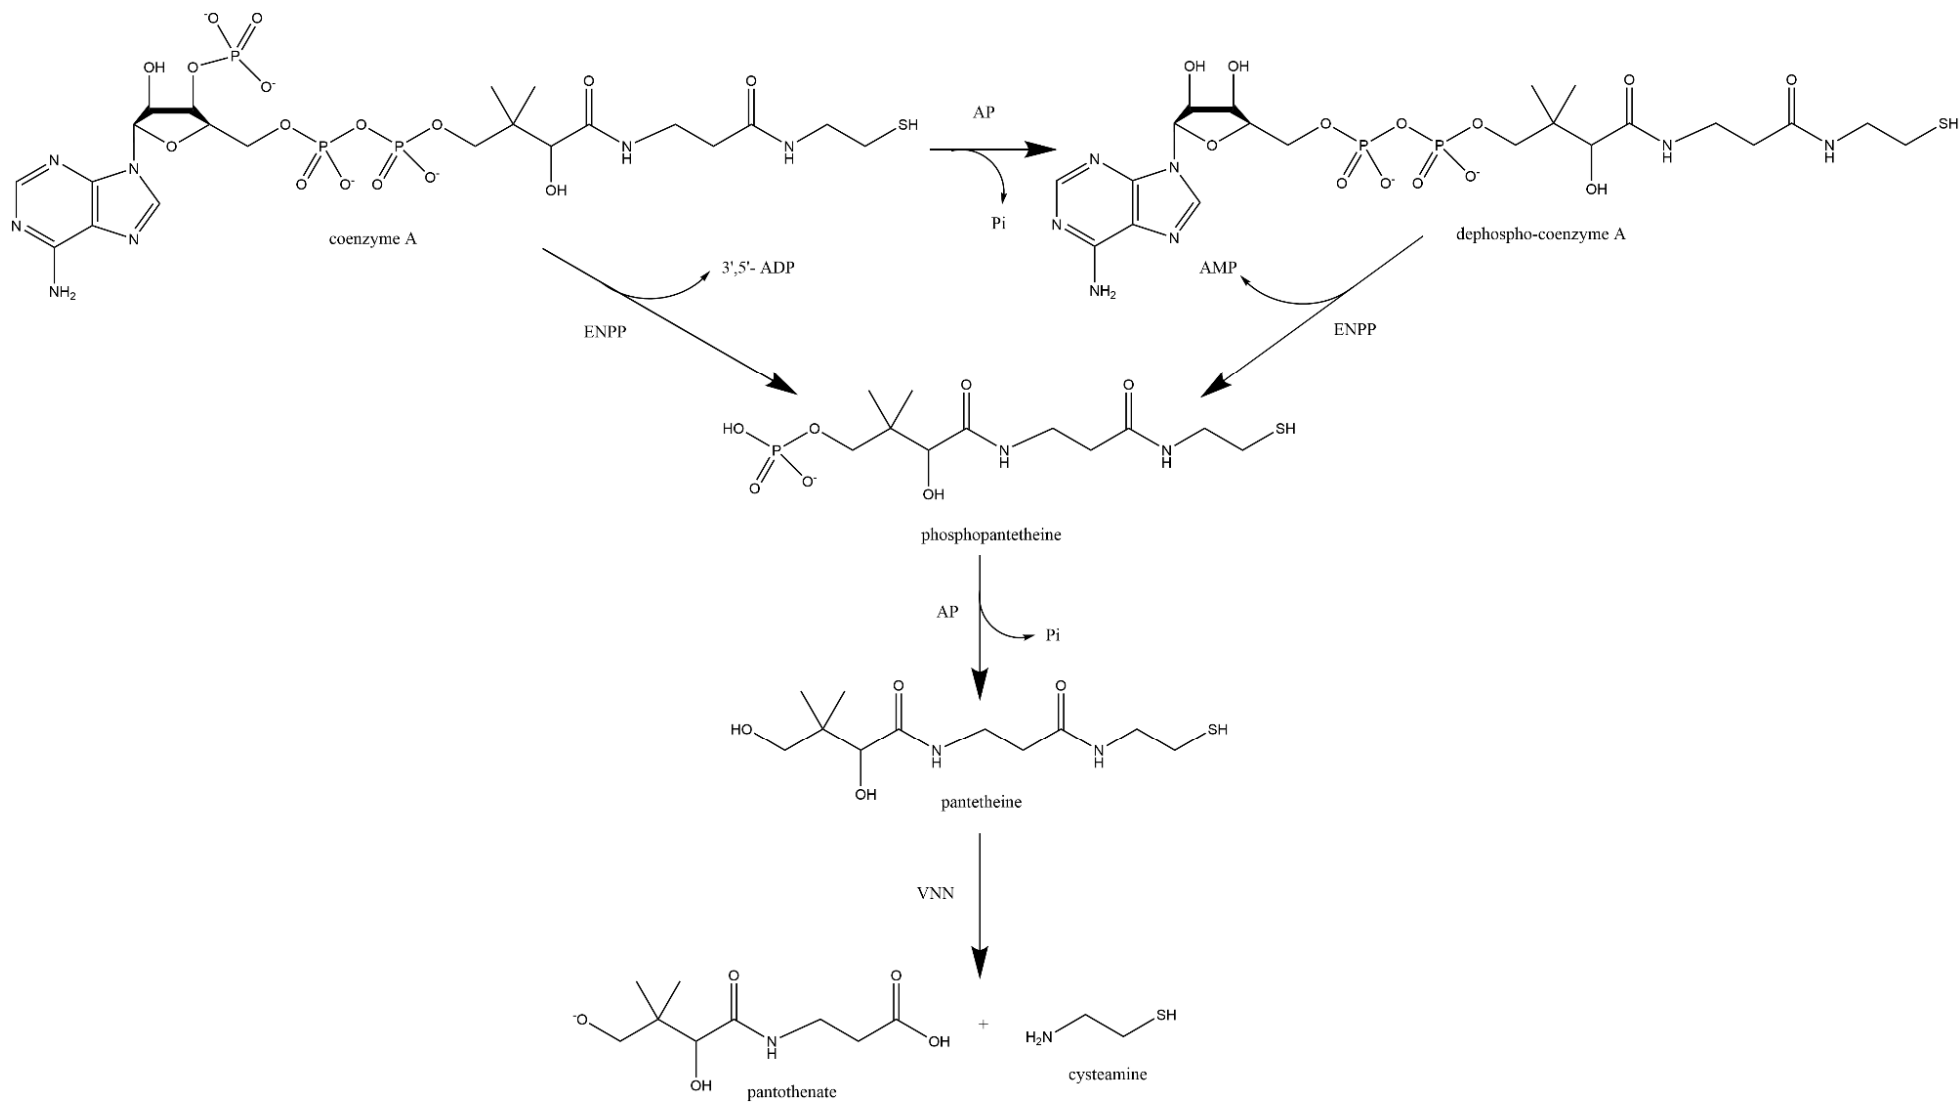

**Figure S1. Hydrolytic reactions leading to release of vitamin B<sub>5</sub>.** AP, alkaline phosphatase; ENPP, ectonucleotide pyrophosphatase/phosphodiesterase; VNN, vascular non-inflammatory molecule (vanin).

## References

1. Hampel, D.; York, E.R.; Allen, L.H. Ultra-performance liquid chromatography tandem mass-spectrometry (UPLC-MS/MS) for the rapid, simultaneous analysis of thiamin, riboflavin, flavin adenine dinucleotide, nicotinamide and pyridoxal in human milk. *J Chromatogr B Analyt Technol Biomed Life Sci* **2012**, *903*, 7-13, doi:10.1016/j.jchromb.2012.06.024.
2. Roelofsen-de Beer, R.; van Zelst, B.D.; Wardle, R.; Kooij, P.G.; de Rijke, Y.B. Simultaneous measurement of whole blood vitamin B1 and vitamin B6 using LC-ESI-MS/MS. *J Chromatogr B Analyt Technol Biomed Life Sci* **2017**, *1063*, 67-73, doi:10.1016/j.jchromb.2017.08.011.
3. Cheng, X.; Ma, D.; Fei, G.; Ma, Z.; Xiao, F.; Yu, Q.; Pan, X.; Zhou, F.; Zhao, L.; Zhong, C. A single-step method for simultaneous quantification of thiamine and its phosphate esters in whole blood sample by ultra-performance liquid chromatography-mass spectrometry. *J Chromatogr B Analyt Technol Biomed Life Sci* **2018**, *1095*, 103-111, doi:10.1016/j.jchromb.2018.07.030.
4. Ren, X.N.; Yin, S.A.; Yang, Z.Y.; Yang, X.G.; Shao, B.; Ren, Y.P.; Zhang, J. Application of UPLC-MS/MS Method for Analyzing B-vitamins in Human Milk. *Biomed Environ Sci* **2015**, *28*, 738-750, doi:10.3967/bes2015.104.
5. Verstraete, J.; Stove, C. Patient-Centric Assessment of Thiamine Status in Dried Blood Volumetric Absorptive Microsamples Using LC-MS/MS Analysis. *Anal Chem* **2021**, *93*, 2660-2668, doi:10.1021/acs.analchem.0c05018.
6. Kahoun, D.; Fojtíková, P.; Vácha, F.; Nováková, E.; Hypša, V. Development and validation of an LC-MS/MS method for determination of B vitamins and some its derivatives in whole blood. *bioRxiv* **2021**, doi:10.1101/2021.01.18.427110.
7. Armah, S.; Ferruzzi, M.G.; Gletsu-Miller, N. Feasibility of Mass-Spectrometry to Lower Cost and Blood Volume Requirements for Assessment of B Vitamins in Patients Undergoing Bariatric Surgery. *Metabolites* **2020**, *10*, doi:10.3390/metabo10060240.
8. Diniz, M.; Dias, N.; Andrade, F.; Paulo, B.; Ferreira, A. Isotope dilution method for determination of vitamin B2 in human plasma using liquid chromatography-tandem mass spectrometry. *J Chromatogr B Analyt Technol Biomed Life Sci* **2019**, *1113*, 14-19, doi:10.1016/j.jchromb.2019.03.001.
9. Jeong Hyeon, M.; Shin Beom, S.; Shin, S. Liquid Chromatography-Tandem Mass Spectrometry Analysis of Riboflavin in Beagle Dog Plasma for Pharmacokinetic Studies. *Mass Spectrom. Lett.* **2020**, *11*, 10-14, doi:10.5478/MSL.2020.11.1.10.
10. Meisser Redeuil, K.; Longuet, K.; Benet, S.; Munari, C.; Campos-Gimenez, E. Simultaneous quantification of 21 water soluble vitamin circulating forms in human plasma by liquid chromatography-mass spectrometry. *J Chromatogr A* **2015**, *1422*, 89-98, doi:10.1016/j.chroma.2015.09.049.
11. Khaksari, M.; Mazzoleni, L.; Ruan, C.; Song, P.; Hershey, N.; Kennedy, R.; Burns, M.; Minerick, A. Detection and quantification of vitamins in microliter volumes of biological samples by Lc MS for clinical screening. *AIChE Journal* **2018**, *64*, 3709-3718, doi:10.1002/aic.16345.
12. Bishop, A.M.; Fernandez, C.; Whitehead, R.D., Jr.; Morales, A.P.; Barr, D.B.; Wilder, L.C.; Baker, S.E. Quantification of riboflavin in human urine using high performance liquid chromatography-tandem mass spectrometry. *J Chromatogr B Analyt Technol Biomed Life Sci* **2011**, *879*, 1823-1826, doi:10.1016/j.jchromb.2011.04.032.
13. Zhang, Q.; Ford, L.A.; Goodman, K.D.; Freed, T.A.; Hauser, D.M.; Conner, J.K.; Vroom, K.E.; Toal, D.R. LC-MS/MS method for quantitation of seven biomarkers in human plasma for the assessment of insulin resistance and impaired glucose tolerance. *J Chromatogr B Analyt Technol Biomed Life Sci* **2016**, doi:10.1016/j.jchromb.2016.10.025.
14. Jenčo, J.; Krčmová, L.K.; Sobotka, L.; Bláha, V.; Solich, P.; Švec, F. Development of novel liquid chromatography method for clinical monitoring of vitamin B1 metabolites and B6 status in the whole blood. *Talanta* **2020**, *211*, 120702, doi:10.1016/j.talanta.2019.120702.

15. Mathew, E.M.; Sakore, P.; Lewis, L.; Manokaran, K.; Rao, P.; Moorkoth, S. Development and validation of a dried blood spot test for thiamine deficiency among infants by HPLC-fluorimetry. *Biomed Chromatogr* **2019**, *33*, e4668, doi:10.1002/bmc.4668.
16. Huang, Y.; Gibson, R.A.; Green, T.J. Measuring thiamine status in dried blood spots. *Clin Chim Acta* **2020**, *509*, 52-59, doi:10.1016/j.cca.2020.06.011.
17. Nguyen, V.L.; Darman, M.; Ireland, A.; Fitzpatrick, M. A high performance liquid chromatography fluorescence method for the analysis of both pyridoxal-5-phosphate and thiamine pyrophosphate in whole blood. *Clin Chim Acta* **2020**, *506*, 129-134, doi:10.1016/j.cca.2020.03.026.
18. Petteys, B.J.; Frank, E.L. Rapid determination of vitamin B<sub>2</sub> (riboflavin) in plasma by HPLC. *Clin Chim Acta* **2011**, *412*, 38-43, doi:10.1016/j.cca.2010.08.037.
19. Stuetz, W.; Carrara, V.I.; McGready, R.; Lee, S.J.; Biesalski, H.K.; Nosten, F.H. Thiamine diphosphate in whole blood, thiamine and thiamine monophosphate in breast-milk in a refugee population. *PLoS One* **2012**, *7*, e36280, doi:10.1371/journal.pone.0036280.
20. Mandal, S.M.; Mandal, M.; Ghosh, A.K.; Dey, S. Rapid determination of vitamin B<sub>2</sub> and B<sub>12</sub> in human urine by isocratic liquid chromatography. *Anal Chim Acta* **2009**, *640*, 110-113, doi:10.1016/j.aca.2009.03.009.
21. Heydari, R.; Elyasi, N.S. Ion-pair cloud-point extraction: a new method for the determination of water-soluble vitamins in plasma and urine. *J Sep Sci* **2014**, *37*, 2724-2731, doi:10.1002/jssc.201400642.
22. Song, Z.; Hou, S. Determination of picomole amounts of thiamine through flow-injection analysis based on the suppression of luminol-KIO<sub>4</sub> chemiluminescence system. *J Pharm Biomed Anal* **2002**, *28*, 683-691, doi:10.1016/s0731-7085(01)00655-0.
23. Shankar, S.; John, S.A. Sensitive and highly selective determination of vitamin B<sub>1</sub> in the presence of other vitamin B complexes using functionalized gold nanoparticles as fluorophore. *Rsc Advances* **2015**, *5*, 49920-49925, doi:10.1039/c5ra09165a.
24. Prasad, B.B.; Singh, R.; Singh, K. Development of highly electrocatalytic and electroconducting imprinted film using Ni nanomer for ultra-trace detection of thiamine. *Sensors and Actuators B-Chemical* **2017**, *246*, 38-45, doi:10.1016/j.snb.2017.02.033.
25. Zhang, H.; Chen, H.; Li, H.; Pan, S.; Ran, Y.; Hu, X. Construction of a novel turn-on-off fluorescence sensor used for highly selective detection of thiamine via its quenching effect on o-phen-Zn(2+) complex. *Luminescence* **2018**, *33*, 1128-1135, doi:10.1002/bio.3519.
26. Asgharian Marzabad, M.; Jafari, B.; Norouzi, P. Determination of Riboflavin by Nanocomposite Modified Carbon Paste Electrode in Biological Fluids Using Fast Fourier Transform Square Wave Voltammetry. *Int. J. Eng* **2020**, *33*, 1696-1702, doi:10.5829/ije.2020.33.09c.01.
27. Tyśkiewicz, K.; Dębczak, A.; Gieysztor, R.; Szymczak, T.; Rój, E. Determination of fat- and water-soluble vitamins by supercritical fluid chromatography: A review. *J Sep Sci* **2018**, *41*, 336-350, doi:10.1002/jssc.201700598.
28. Taguchi, K.; Fukusaki, E.; Bamba, T. Determination of niacin and its metabolites using supercritical fluid chromatography coupled to tandem mass spectrometry. *Mass Spectrom (Tokyo)* **2014**, *3*, A0029, doi:10.5702/massspectrometry.A0029.
29. ImmundiagnostikAG. ID-Vit<sup>®</sup> Pantothenic acid. Available online: [https://www.immundiagnostik.com/media/pages/testkits/kif004/1c6c7f961a-1633917660/kif004\\_2019-05-23\\_pantothenaeure.pdf](https://www.immundiagnostik.com/media/pages/testkits/kif004/1c6c7f961a-1633917660/kif004_2019-05-23_pantothenaeure.pdf) (accessed on 10.7.2021).
30. ImmundiagnostikAG. ID-Vit<sup>®</sup> Niacin. Available online: [https://www.immundiagnostik.com/media/pages/testkits/kif003/2d1c628e3b-1633917660/kif003\\_2019-05-23\\_niacin.pdf](https://www.immundiagnostik.com/media/pages/testkits/kif003/2d1c628e3b-1633917660/kif003_2019-05-23_niacin.pdf) (accessed on 10.7.2021).
31. RECIPEChemicals+InstrumentsGmbH. VITAMIN B<sub>1</sub>, B<sub>2</sub> AND B<sub>6</sub> (COMBIKIT). Available online: <https://recipe.de/products/combikit-vitamin-b1-b2-b6-whole-blood/> (accessed on 10.7.2021).
32. ImmundiagnostikAG. Vitamin B<sub>1</sub> HPLC Kit. Available online: [https://www.immundiagnostik.com/media/pages/testkits/kc2201/59011e2c72-1633658467/vitamin-b1\\_kc2201.pdf](https://www.immundiagnostik.com/media/pages/testkits/kc2201/59011e2c72-1633658467/vitamin-b1_kc2201.pdf) (accessed on 10.7.2021).
33. RECIPEChemicals+InstrumentsGmbH. VITAMIN B<sub>1</sub>. Available online: <https://recipe.de/products/vitamin-b1-whole-blood/> (accessed on 10.7.2021).
34. RECIPEChemicals+InstrumentsGmbH. VITAMIN B<sub>2</sub>. Available online: <https://recipe.de/products/vitamin-b2-whole-blood/> (accessed on 10.7.2021).

35. RECIPEChemicals+InstrumentsGmbH. VITAMINS B1, B2, B6. Available online: <https://recipe.de/products/vitamins-b1-b2-b6-in-whole-blood/> (accessed on 10.7.2021).
36. LSBio. Vitamin B2 / Riboflavin (Competitive EIA) ELISA Kit - LS-F55485. Available online: <https://www.lsbio.com/elisakits/vitamin-b2-riboflavin-competitive-eia-elisa-kit-ls-f55485/55485> (accessed on 10.7.2021).
37. AntibodiesonlineGmbH. Vitamin B2 (Riboflavin) ELISA Kit. Available online: <https://www.antibodies-online.com/kit/1059863/Vitamin+B2+Riboflavin+ELISA+Kit/> (accessed on 10.7.2021).
38. MYBioSource. Thiamine elisa kit :: Human Thiamine ELISA Kit. Available online: <https://www.mybiosource.com/human-elisa-kits/thiamine/167383> (accessed on 10.7.2021).
39. Lienhart, W.D.; Gudipati, V.; Macheroux, P. The human flavoproteome. *Arch Biochem Biophys* **2013**, *535*, 150-162, doi:10.1016/j.abb.2013.02.015.
40. Institute of Medicine (US) Standing Committee on the Scientific Evaluation of Dietary Reference Intakes and its Panel on Folate, O.B.V., and Choline. Dietary Reference Intakes for Thiamin, Riboflavin, Niacin, Vitamin B6, Folate, Vitamin B12, Pantothenic Acid, Biotin, and Choline. In *Dietary Reference Intakes for Thiamin, Riboflavin, Niacin, Vitamin B6, Folate, Vitamin B12, Pantothenic Acid, Biotin, and Choline*; The National Academies Collection: Reports funded by National Institutes of Health; National Academies Press (US), National Academy of Sciences.: Washington (DC), 1998.
